# Supplementary material for: Chitosan-Based Therapeutic Systems for Superficial Candidiasis Treatment. Synergetic Activity of Nystatin and Propolis
Source: MDPI journal article supplement (doi:10.3390/polym14040689), 2022-02-11
Supplement: s1 [file s1]

## Supplementary materials

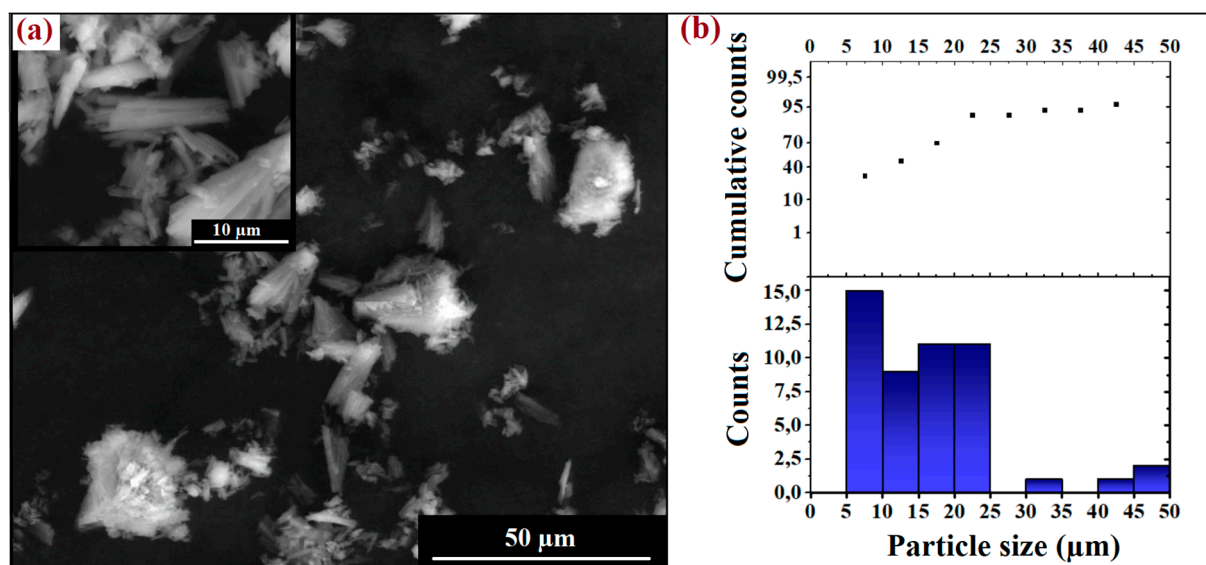

**Figure S1.** Nystatin powder: (a) Scanning electron microscopy images for nystatin powder and (b) particle size distribution histogram (particle sizes were determined using NIH Image J software).

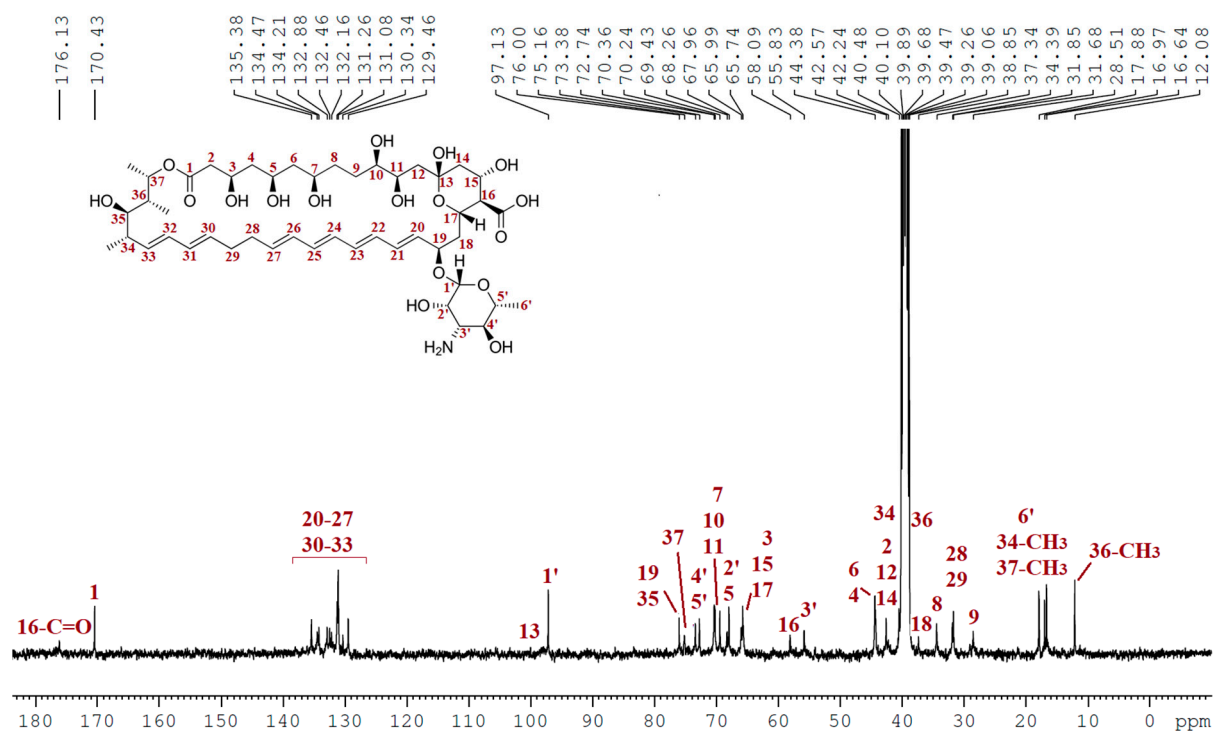

**Figure S2.**  $^{13}\text{C}$ -RMN spectrum of nystatin; IUPAC Name: (1S,3R,4R,7R,9R,11R,15S,16R,17R,18S,19E, 21E,25E, 27E, 29E,31E,33R,35S,36R,37S)-33-[(2R,3S,4S,5S,6R)-4-amino-3,5-dihydroxy-6-methyloxan-2-yl]oxy-1,3,4,7,9,11,17,37-octahydroxy-15,16,18-trimethyl-13-oxo-14,39-dioxabicyclo[33.3.1]nonatriaconta-19,21,25,27,29,31-hexaene-36-carboxylic acid); signal attributions made according to ref. [44-46].

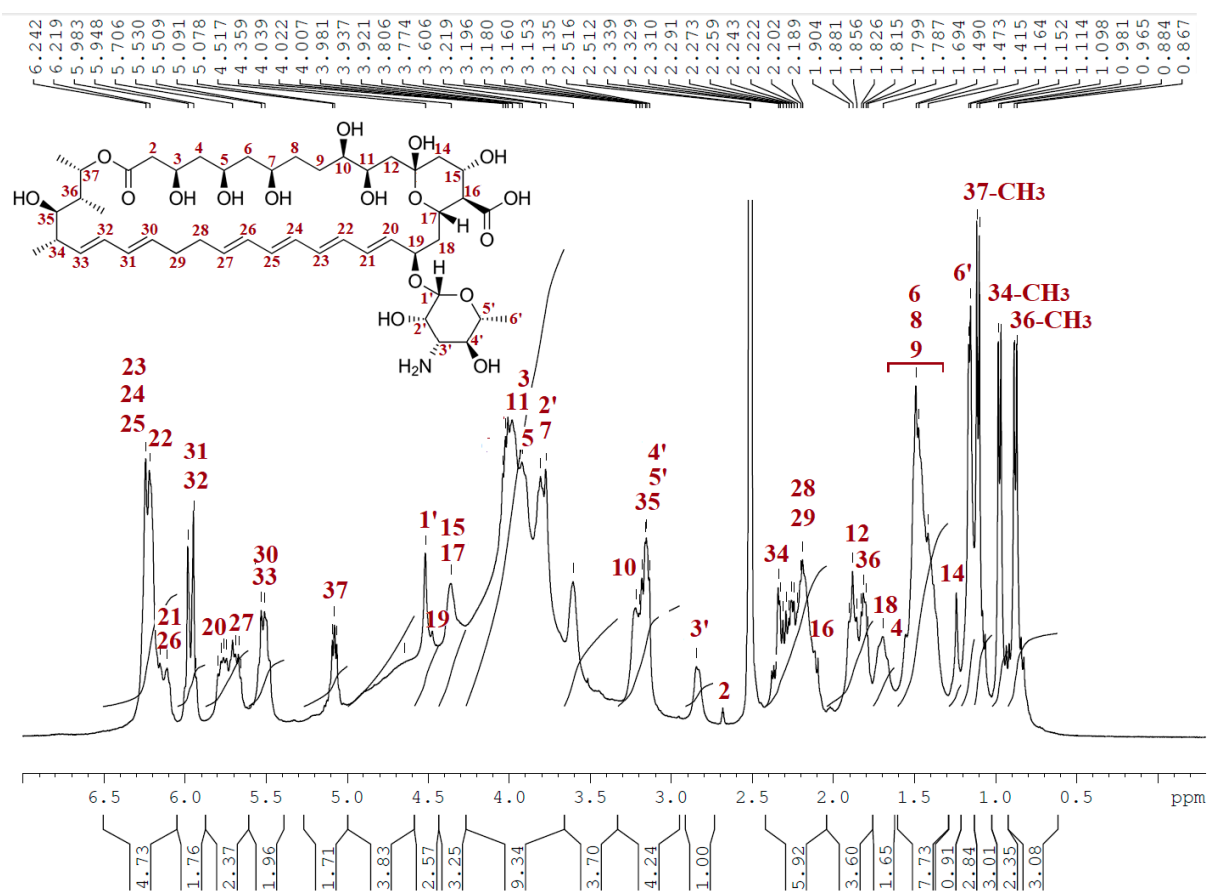

**Figure S3.** <sup>1</sup>H-RMN spectrum of nystatin. IUPAC Name: (1S,3R,4R,7R,9R,11R,15S,16R,17R,18S,19E, 21E,25E, 27E,29E,31E,33R,35S,36R,37S)-33-[(2R,3S,4S,5S,6R)-4-amino-3,5-dihydroxy-6-methyloxan-2-yl]oxy-1,3,4,7,9,11,17,37-octahydroxy-15,16,18-trimethyl-13-oxo-14,39-dioxabicyclo[33.3.1]nonatriaconta-19,21,25,27,29,31-hexaene-36-carboxylic acid); signal attributions made according to ref. [44-46].

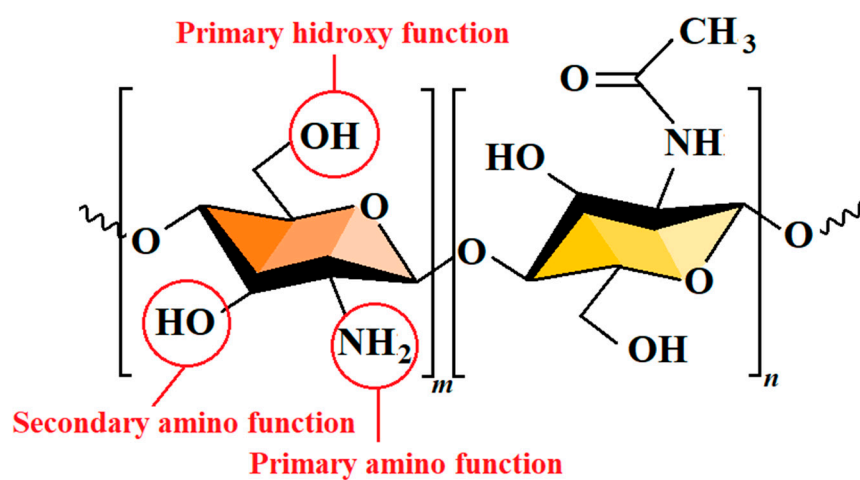

**Figure S4.** Chemical formula of chitosan with highlighting the functional groups: free primary amino groups (NH<sub>2</sub> to C2), primary hydroxyl group (OH to C6) and secondary hydroxyl groups (OH to C3); *m* and *n* represent the numbers of deacetylated (d-glucosamine) and N-acetyl-d-glucosamine repeating units, linked by (1-4)-β-glycosidic linkages, respectively.

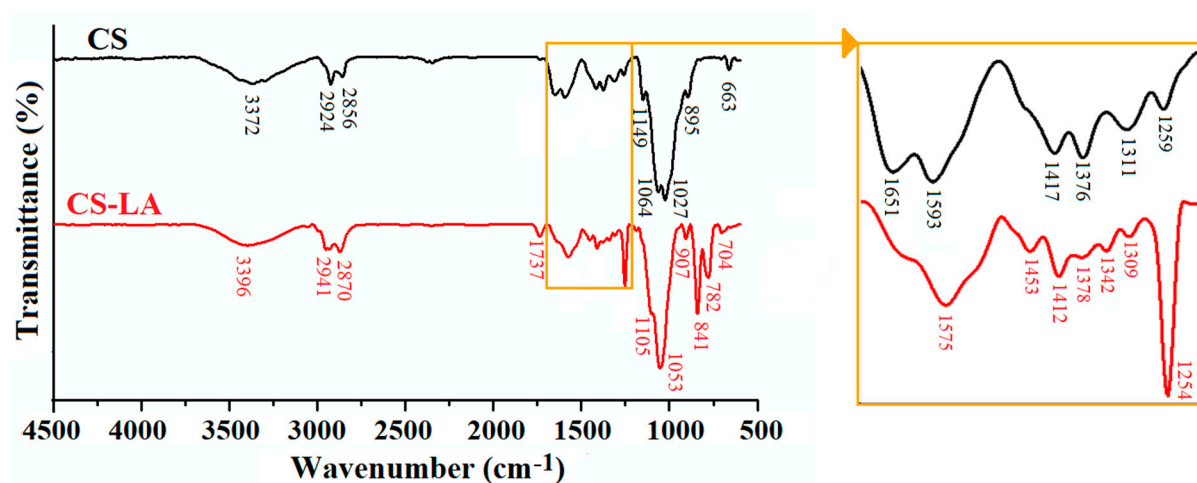

**Figure S5.** FTIR spectra of chitosan powder (CS) and chitosan gel (3%) after dispersion in 2% lactic acid solution (CS-LA).

The spectrum of chitosan shows polysaccharide characteristic absorption bands found in the range 4000–600 cm<sup>-1</sup>: the broad band located between 3500–3100 cm<sup>-1</sup> results from the stretching vibrations of superimposed O–H and N–H bonds; the absorption bands corresponding to the asymmetric and symmetrical stretching vibrations of the C–H are observed at 2924 cm<sup>-1</sup>, and 2856 cm<sup>-1</sup> respectively; the stretching vibration of the C=O bond of amide I (O=C–NHR) is distinguished at 1651 cm<sup>-1</sup>; the band at 1593 cm<sup>-1</sup> is caused by the in-plane deformation vibration of the primary amine group NH<sub>2</sub> coupled with the stretching vibrations of amide II, and that at 1311 cm<sup>-1</sup> by the tensile vibrations of the C–N bond (amide III); the absorption bands given by the deformation vibrations of the CH<sub>2</sub> and CH<sub>3</sub> group appear at 1417 cm<sup>-1</sup>, respectively 1376 cm<sup>-1</sup>; the absorption band from 1149 cm<sup>-1</sup> is attributed to the asymmetric stretching vibrations of the C–O–C glycosidic bonds, and the bands from 1064 and 1027 cm<sup>-1</sup> are due to the C–O stretching vibrations, characteristic of the saccharide structure [19].

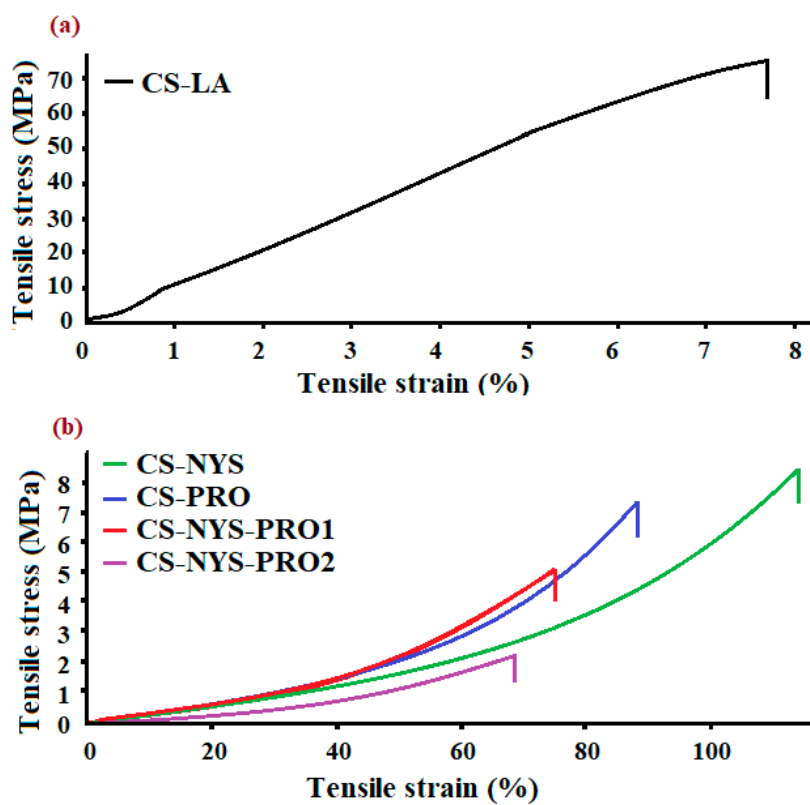

**Figure S6.** Characteristic stress-strain curves of the films: (a) without biological active compounds (CS-LA); (b) nystatin, propolis and nystatin/propolis loaded chitosan films (CS-NYS, CS-PRO, CS-NYS-PRO1, CS-NYS-PRO2).

**Table S1.** Parameters of pseudo-second order (PSO) and Korsmeyer-Peppas (K-P) kinetic models, where  $k_s$  is the constant of the swelling rate,  $S_e$  is the theoretical swelling capacity at equilibrium,  $k_p$  is a constant dependent on the polymeric network;  $n$  is the diffusion parameter of aqueous PBS in the formulation film and SD represents the standard deviation of  $n=11$ ); swelling capacity in PBS of chitosan charged films after 5 and 24 h.

| Film code   | PSO model parameters       | K-P model parameters      | Swelling capacity after 5 h (%) | Swelling capacity after 24 h (%) |
|-------------|----------------------------|---------------------------|---------------------------------|----------------------------------|
| CS-NYS      | $k_s = 1.86 \cdot 10^{-3}$ | $k_p = 450.17$            | 618                             | 751                              |
|             | $S_e = 600.74$             | $n = 5.9 \cdot 10^{-2}$   |                                 |                                  |
|             | SD = 6.10                  | SD = 8.03                 |                                 |                                  |
| CS-PRO      | $k_s = 5.29 \cdot 10^2$    | $k_p = 121.14$            | 122                             | 122                              |
|             | $S_e = 121.92$             | $n = 4.87 \cdot 10^{-18}$ |                                 |                                  |
|             | SD = 0.37                  | SD = 0.44                 |                                 |                                  |
| CS-NYS-PRO1 | $k_s = 1.21 \cdot 10^{-1}$ | $k_p = 129.14$            | 129                             | 129                              |
|             | $S_e = 130.84$             | $n = 1.40 \cdot 10^{-3}$  |                                 |                                  |
|             | SD = 0.56                  | SD = 0.71                 |                                 |                                  |
| CS-NYS-PRO2 | $k_s = 6.54 \cdot 10^3$    | $k_p = 117.93$            | 118                             | 118                              |
|             | $S_e = 119.35$             | $n = 5.42 \cdot 10^{-18}$ |                                 |                                  |
|             | SD = 0.56                  | SD = 0.71                 |                                 |                                  |

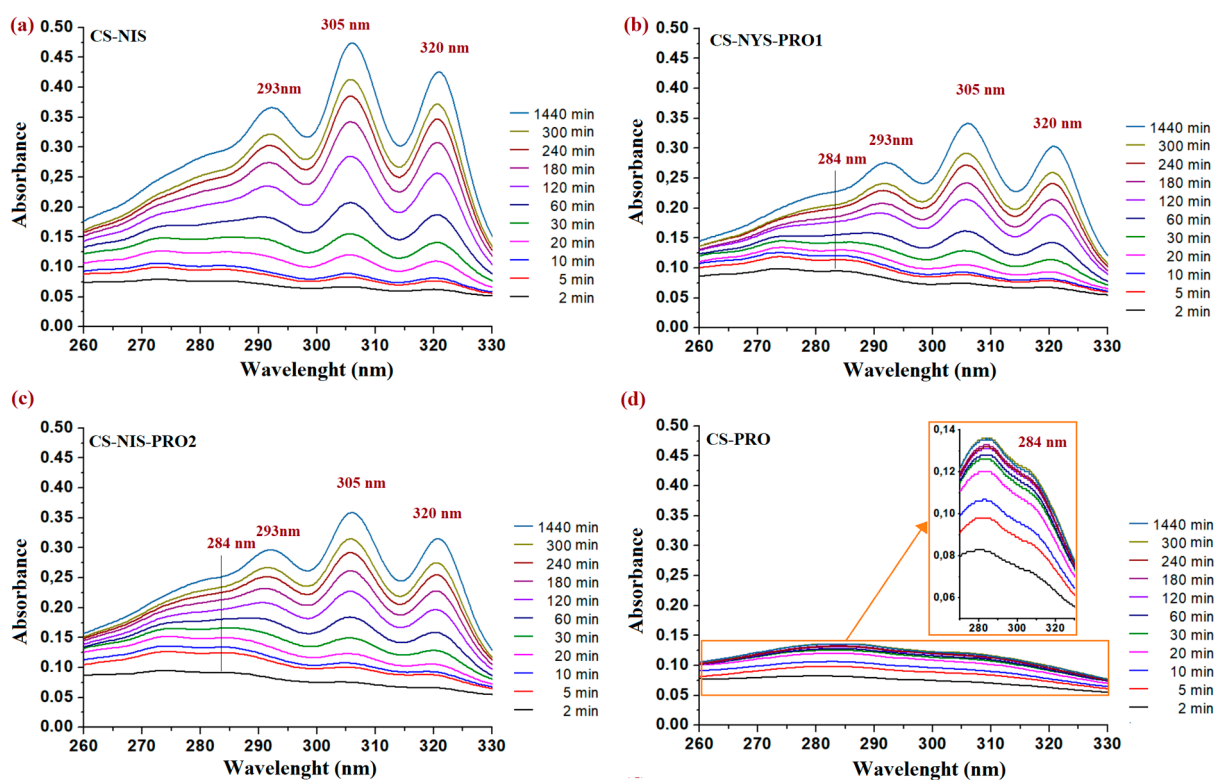

**Figure S7.** Evolution in time of UV-VIS spectra of: nystatin released from CS-NYS (a), CS-NYS-PRO1 (b) and CS-NYS-PRO2 (c); propolis released from CS-PRO (d).



**Table S2.** NYS and PRO release from chitosan films: Korsmeyer-Peppas kinetics parameters ( $k$  represents the transport constant,  $n$  is the diffusion exponent and SD is standard deviation of  $n=11$ ), and release efficiency after 5 and 24 hours.

| Film code   | Drug released | Korsmeyer-Peppas model parameters           | Drug release efficiency after 5 hours (%) | Drug release efficiency after 1 day (%) |
|-------------|---------------|---------------------------------------------|-------------------------------------------|-----------------------------------------|
| CS-NYS      | NYS           | $n = 0.4189821$<br>$k = 0.045$<br>SD = 0.37 | 48.6                                      | 55.2                                    |
| CS-NYS-PRO1 | NYS           | $n = 0.3209252$<br>$k = 0.072$<br>SD = 0.50 | 45.9                                      | 53.3                                    |
| CS-NYS-PRO2 | NYS           | $n = 0.3098546$<br>$k = 0.071$<br>SD = 0.34 | 42.8                                      | 48.7                                    |
| CS-PRO      | PRO           | $n = 0.0806324$<br>$k = 0.157$<br>SD = 0.35 | 24.2                                      | 24.2                                    |



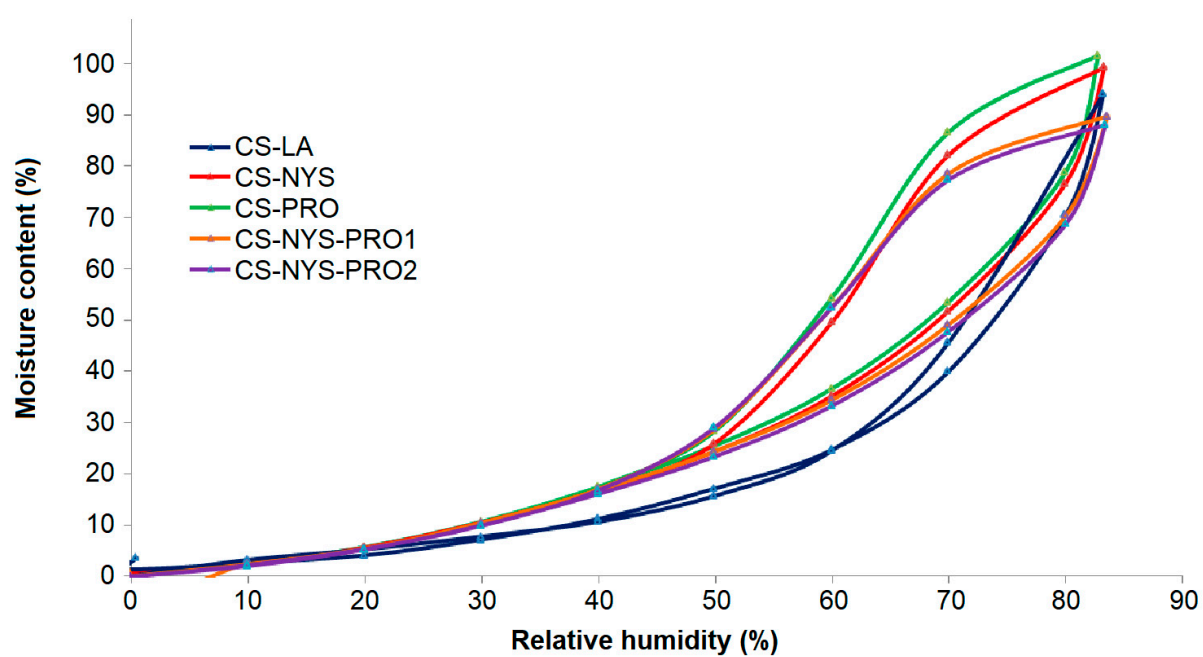

**Figure S8.** Sorption/desorption isotherms for the hydrogel formulations

**Table S3.** Surface parameters of the hydrogels evaluated based on adsorption/desorption isotherms: water vapor sorption capacity, final weight (W); average pore size ( $r_{pm}$ ) and BET data (surface area and monolayer weight).

| Hydrogel Surface | W (%) | $r_{pm}$ (BJH model) (nm) | BET data *               |                  |
|------------------|-------|---------------------------|--------------------------|------------------|
|                  |       |                           | Area (m <sup>2</sup> /g) | Monolayer (mg/g) |
| CS-LA            | 94.1  | 6.8                       | 275                      | 788              |
| CS-NYS           | 99.3  | 1.4                       | 1379                     | 399              |
| CS-PRO           | 101.6 | 2.0                       | 1035                     | 294              |
| CS-NYS-PRO1      | 89.8  | 1.2                       | 1444                     | 412              |
| CS-NYS-PRO2      | 88.1  | 1.0                       | 1727                     | 492              |

Determined based on desorption branch of the isotherm (registered up to a relative humidity of 40 %)

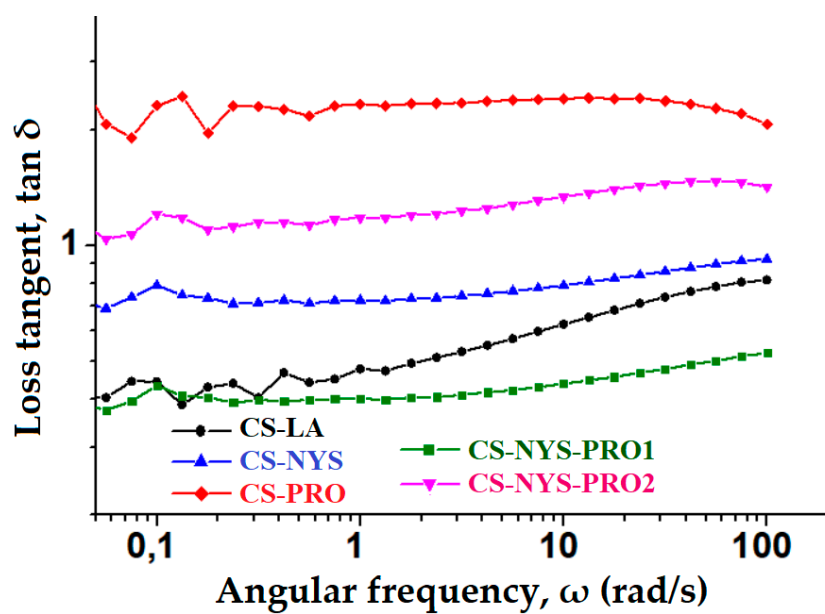

**Figure S9.** The loss tangent ( $\tan \delta = G'' / G'$ ) as a function of angular frequency.

**Table S4.** Viscoelastic parameters ( $G'$ ,  $G''$  and  $\tan \delta$ ) at a frequency of 1 Hz and viscous flow activation energy ( $E_\eta$ ) calculated by fitting the temperature-dependence curve of the viscosity by Arrhenius equation.

| Gel formulation | $G'$<br>(Pa) | $G''$<br>(Pa) | $\tan \delta$ | $E_\eta$ (kcal/mol) |
|-----------------|--------------|---------------|---------------|---------------------|
| CS-LA           | 42.64        | 20.30         | 0.47          | 5.18                |
| CS-NYS          | 20.70        | 14.70         | 0.73          | 5.51                |
| CS-PRO          | 0.94         | 2.22          | 2.31          | 5.67                |
| CS-NYS-PRO1     | 107.05       | 43.96         | 0.40          | 4.81                |
| CS-NYS-PRO2     | 4.43         | 5.45          | 1.18          | 5.28                |

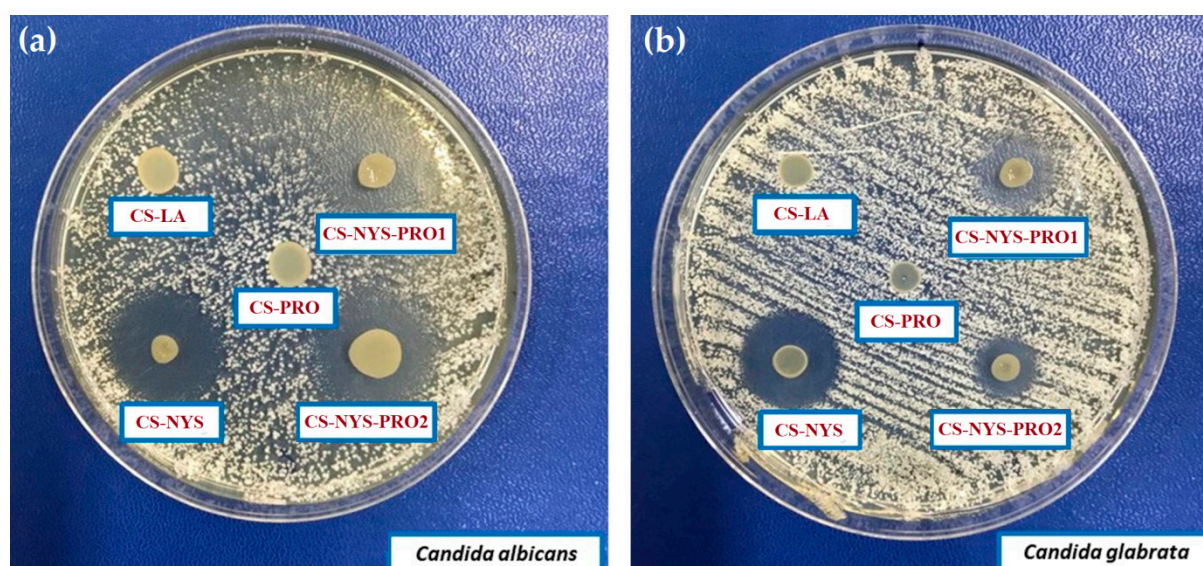

**Figure S10.** Antifungal activity of chitosan hydrogels against: (a) *C. albicans* and (b) *C. glabrata*

**Table S5.** Killing efficiency as a function of time for CS-NYS, CS-PRO and CS-NYS-PRO1 hydrogels, against *Candida albicans* in 24 h, as compared to the control test.

| Time<br>(hours) | <i>Candida albicans</i> (CFU/mL) |                      |                      |                      |
|-----------------|----------------------------------|----------------------|----------------------|----------------------|
|                 | Control                          | CS-NYS               | CS-PRO               | CS-NYS-PRO1          |
| 0               | 1.24x10 <sup>7</sup>             | 1.24x10 <sup>7</sup> | 1.24x10 <sup>7</sup> | 1.24x10 <sup>7</sup> |
| 6               | 1.64x10 <sup>7</sup>             | 2.40x10 <sup>2</sup> | 7.60x10 <sup>6</sup> | <10 <sup>1</sup>     |
| 12              | 1.96x10 <sup>7</sup>             | <10 <sup>1</sup>     | 3.00x10 <sup>6</sup> | <10 <sup>1</sup>     |
| 24              | 4.32x10 <sup>7</sup>             | <10 <sup>1</sup>     | 2.28x10 <sup>6</sup> | <10 <sup>1</sup>     |
